# Supplementary material for: Supported copper on a diamide–diacid-bridged PMO: an efficient hybrid catalyst for the cascade oxidation of benzyl alcohols/Knoevenagel condensation
Source: Royal Society of Chemistry journal article supplement (doi:10.1039/d1ra06509b), 2021-12-20
Supplement: d1ra06509b1.pdf [file d1ra06509b1.pdf]

## Electronic Supporting Information

### Supported copper on a diamide-diacid-bridged PMO: An efficient hybrid catalyst for the cascade oxidation of benzyl alcohols/Knoevenagel condensation

*Ehsan Valiey, Mohammad G. Dekamin\**

*<sup>a</sup>Pharmaceutical and Heterocyclic Compounds Research Laboratory, Department of Chemistry,  
Iran University of Science and Technology, Tehran, 16846-13114, Iran.*

*\*E-mail: mdekamin@iust.ac.ir*

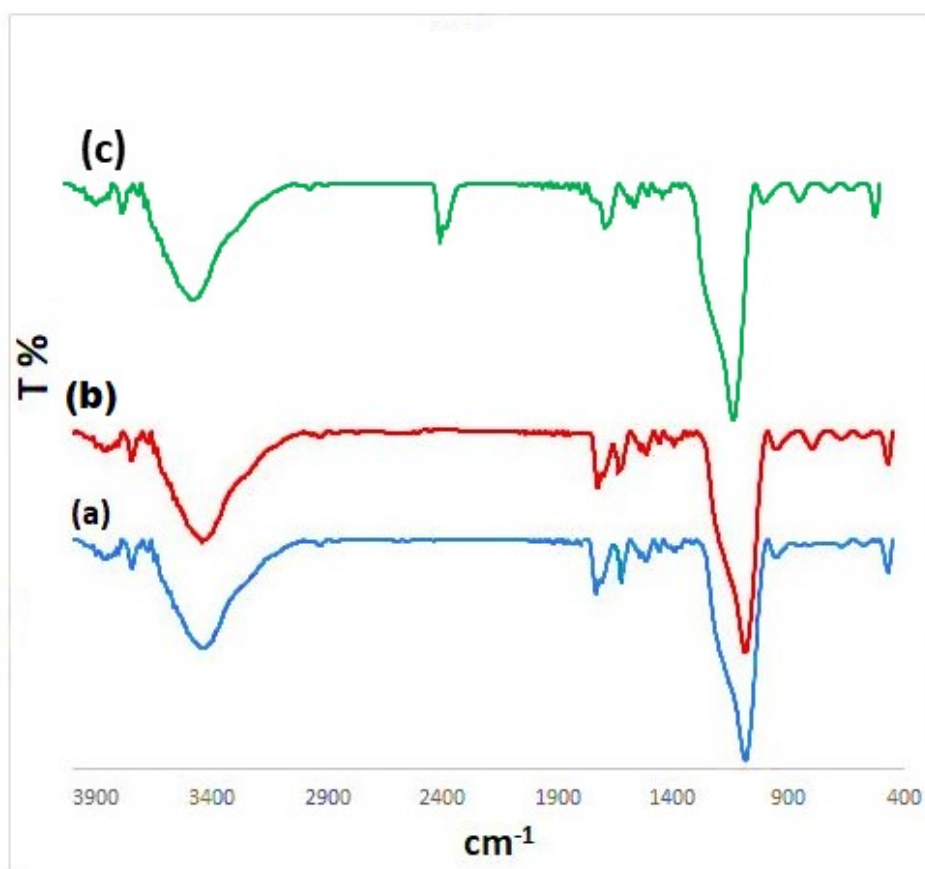

**Fig. S1.** FTIR spectra of the EDTAD-PMO (a), fresh Cu@EDTAD-PMO mesoporous catalyst (**1**, b) and the recycled catalyst after six consecutive runs (c).

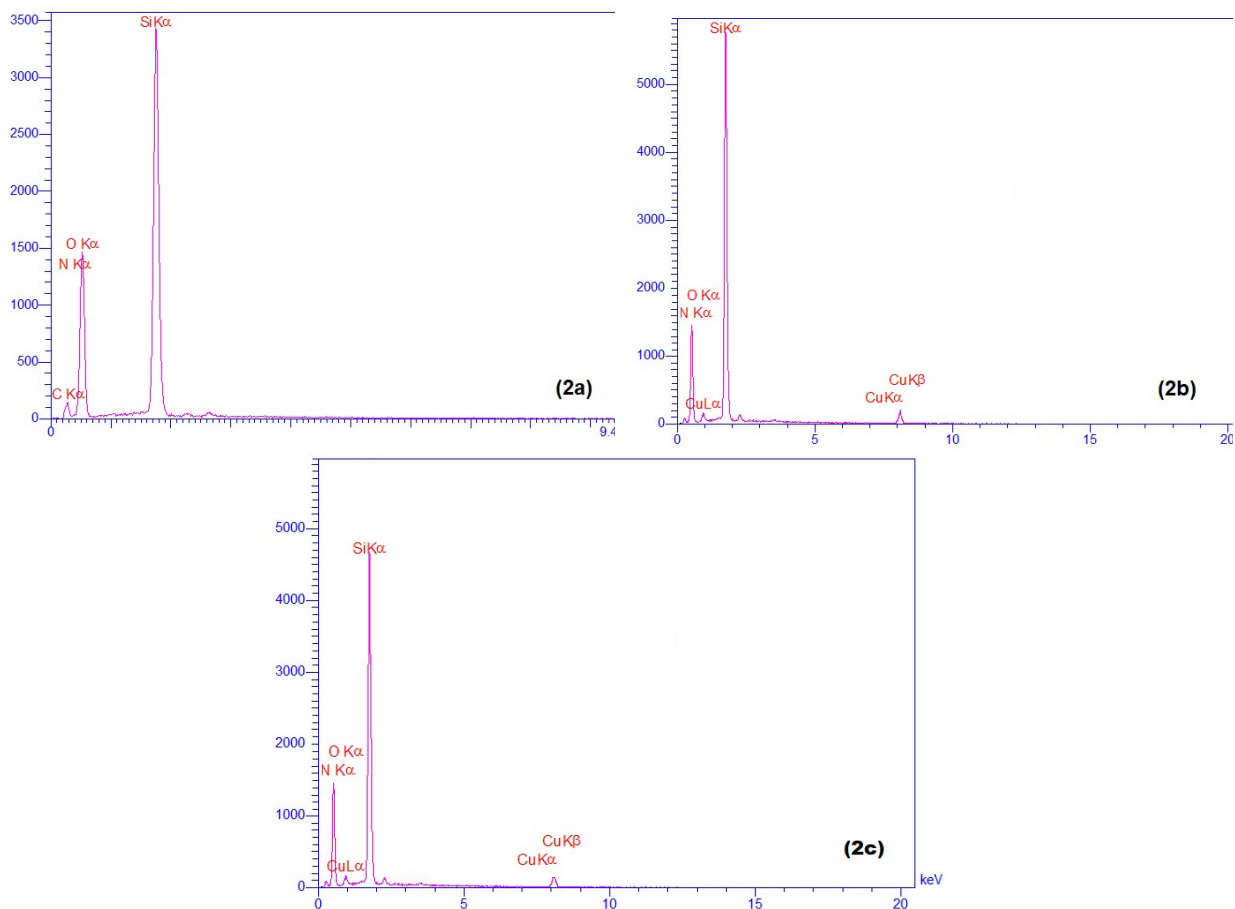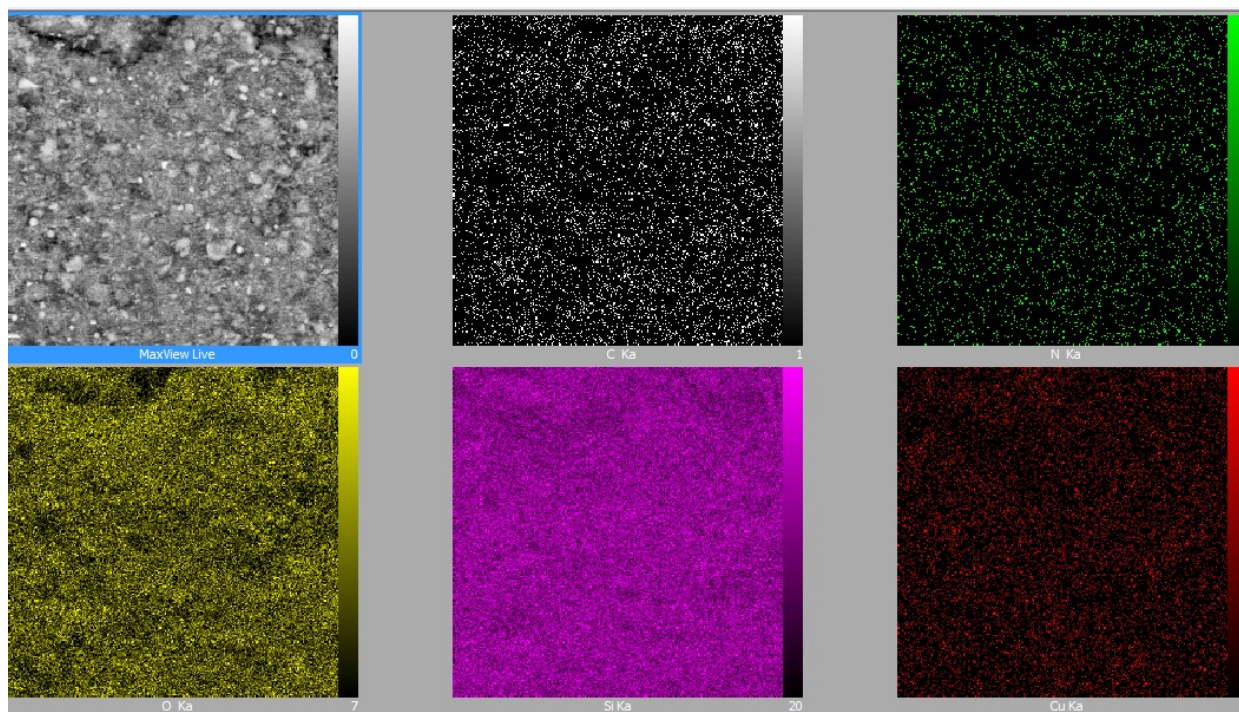

**Fig. S2.** EDX spectra of the EDTAD-PMO (**2a**), fresh Cu@EDTAD-PMO (**1**, **2b**) and the recycled Cu@EDTAD-PMO catalyst (**1**, **2c**) along with the elemental mapping of the fresh Cu@EDTAD-PMO (**1**).

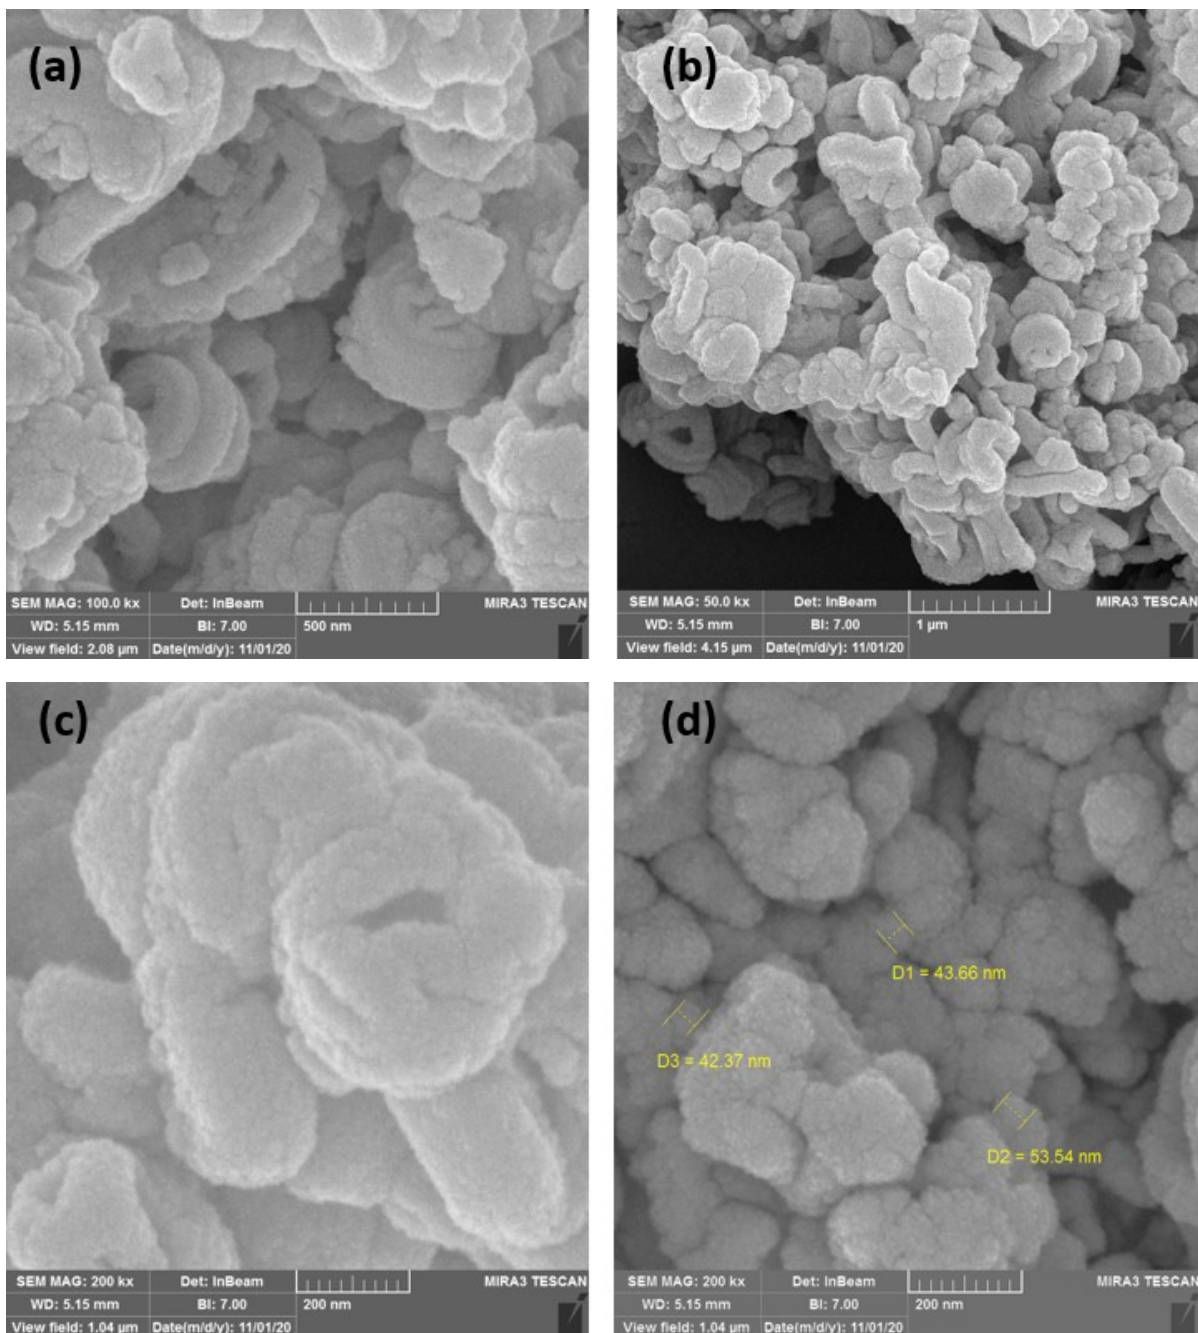

**Fig. S3.** FESEM images of the Cu@EDTAD-PMO nano-ordered catalyst (1).



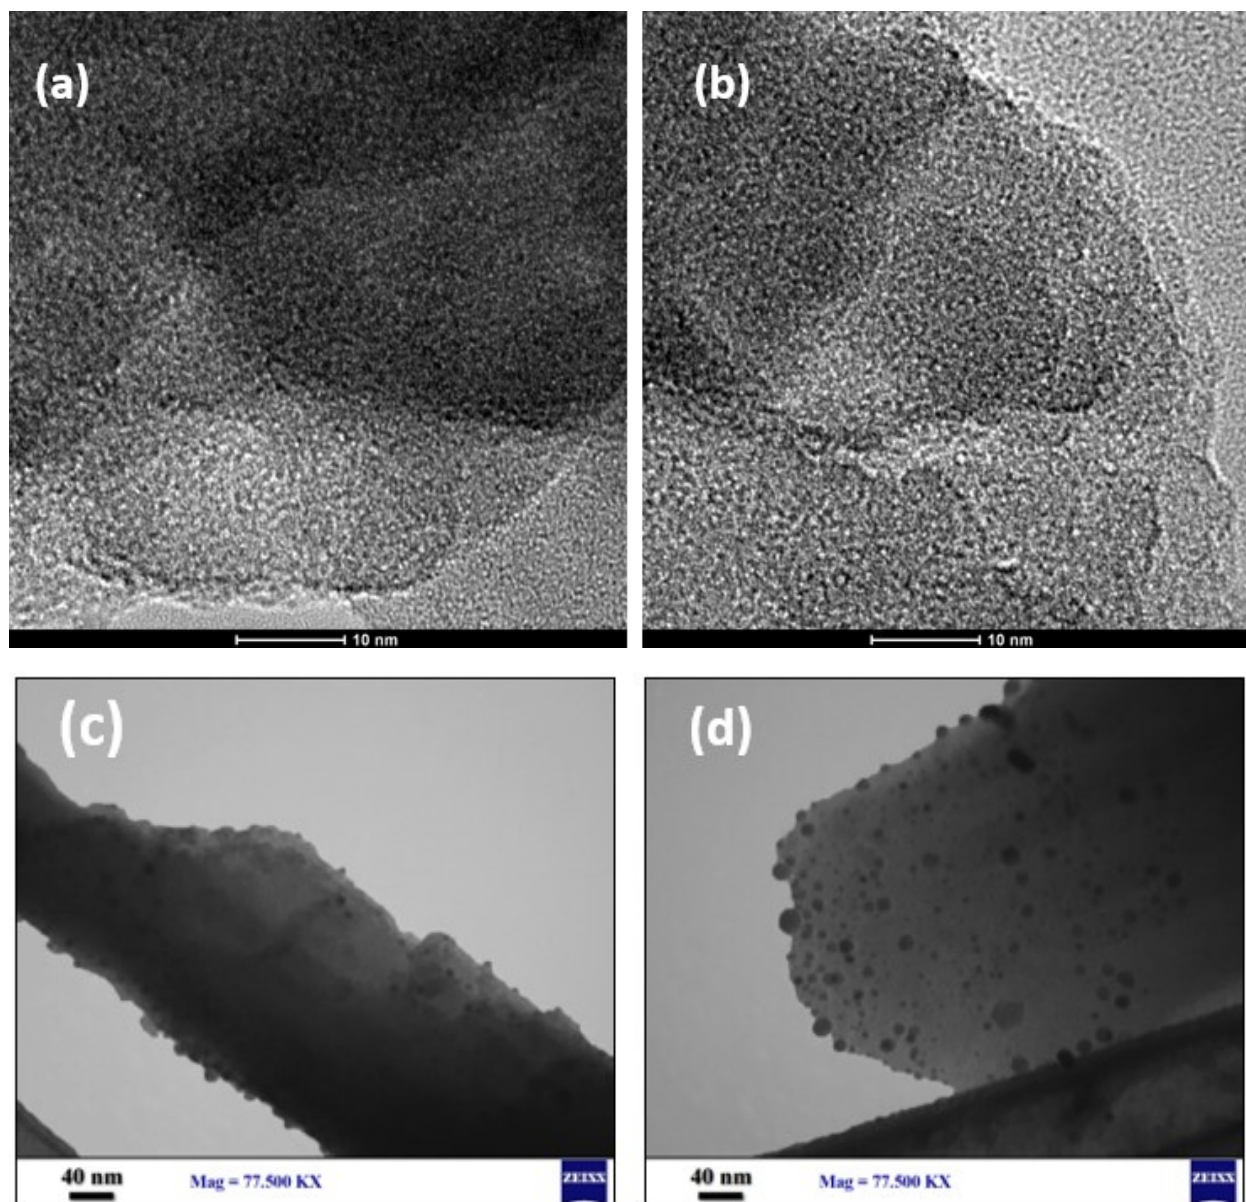

**Fig. S4.** HRTEM images of the Cu@EDTAD-PMO nano-ordered catalyst (1).

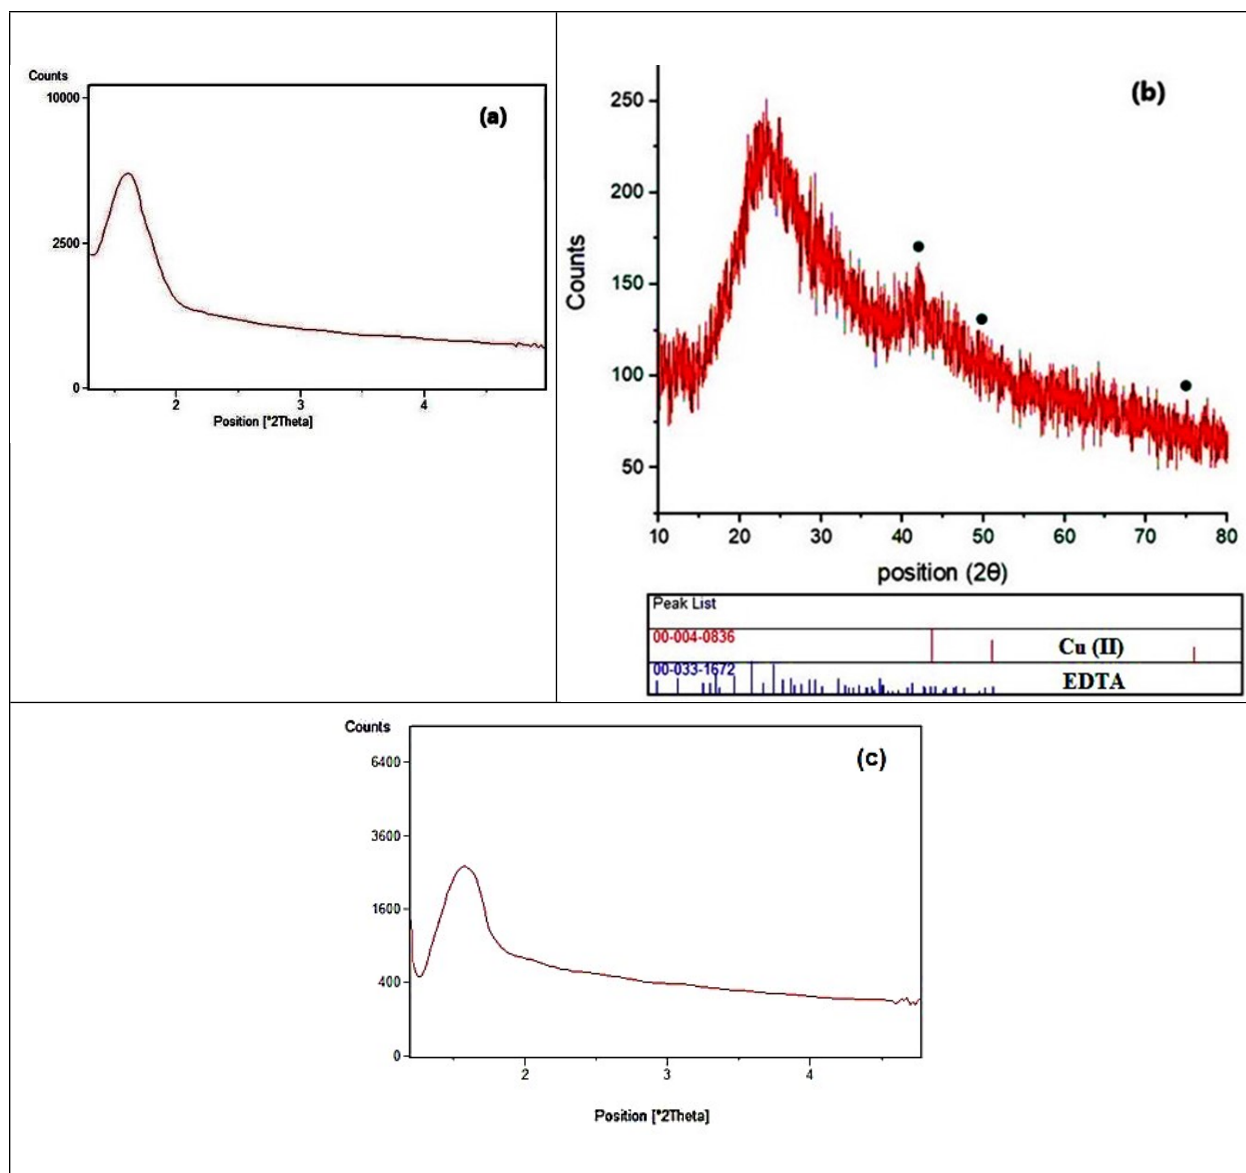

**Fig. S5.** Low-angle (**5a**) and wide-angle (**5b**) XRD patterns of the fresh Cu@EDTAD-PMO catalyst (**1**); low-angle XRD pattern (**5c**) of the recycled Cu@EDTAD-PMO catalyst (**1**) from the model reaction after six consecutive runs.

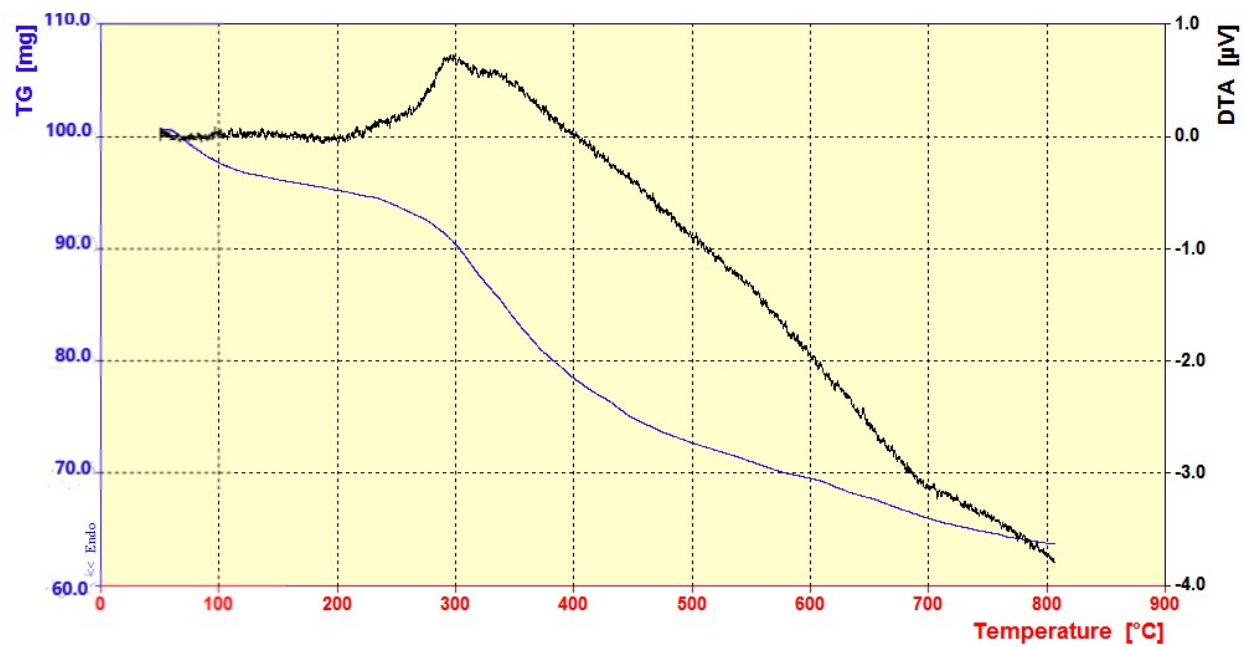

**Fig. S6.** TGA and DTA curves for the Cu@EDTAD-PMO nanomaterial (1).

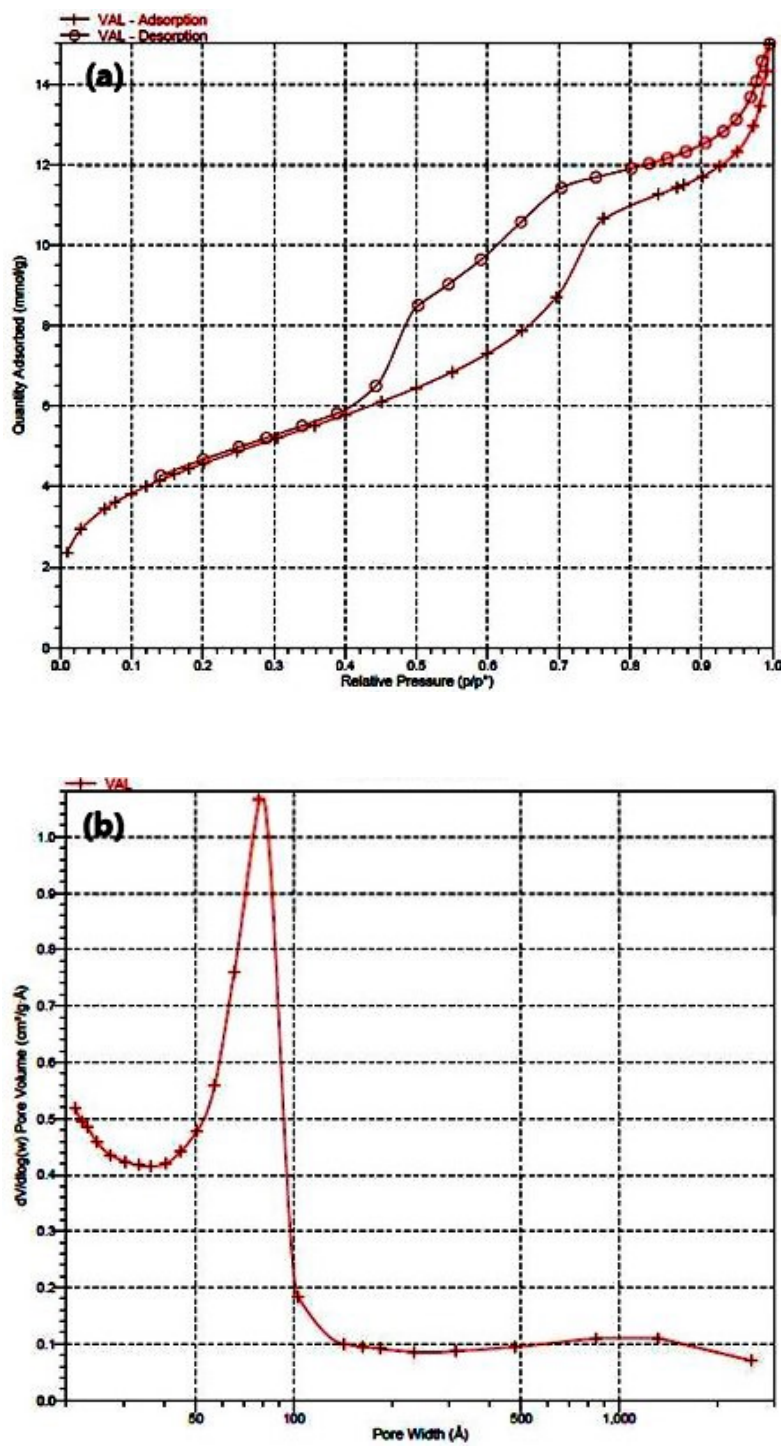

**Fig. S7.** (a)  $N_2$  adsorption–desorption, and (b) pore size distribution isotherms of the Cu@EDTAD-PMO mesoporous material (1).

*Spectral characterization of compounds 2c and 2g*

**2-(4-methylbenzylidene) malononitrile (2c)**

FTIR (KBr,  $\text{cm}^{-1}$ ): 3034, 2962, 2223, 1581, 1554, 1485;  $^1\text{H}$  NMR (500MHz,  $\text{CDCl}_3$ ):  $\delta$  (ppm) 7.82 (d,  $J = 8.0$  Hz, 2H), 7.73 (s, 1H), 7.34 (d,  $J = 8.0$  Hz, 2H), 2.47 (Me, 3H);  $^{13}\text{C}$  NMR (125 MHz,  $\text{CDCl}_3$ )  $\delta$  (ppm) 146.4, 130.9, 130.3, 128.4, 128.3, 114, 112.8, 81.

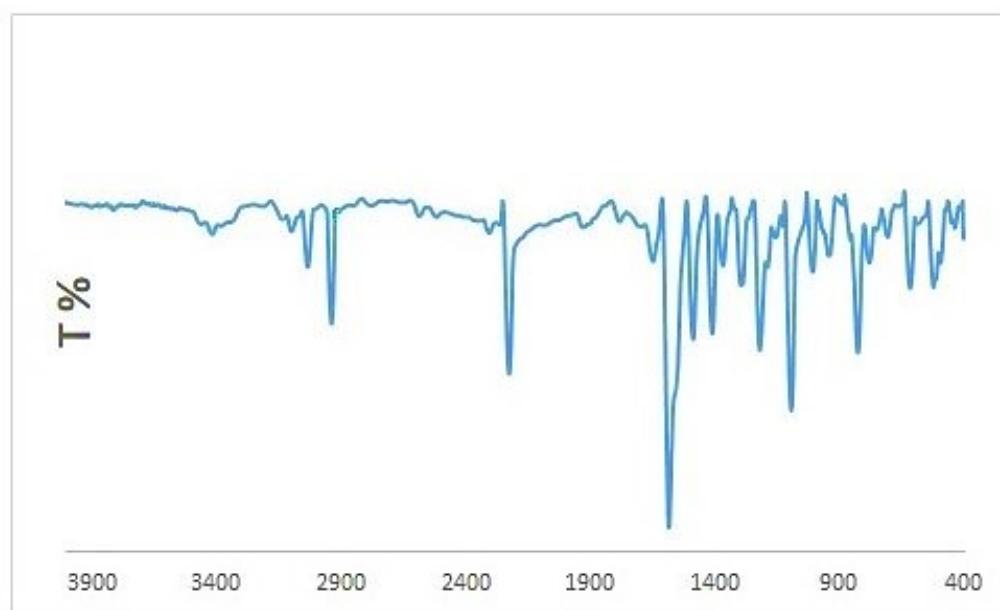

**Fig. S8.** FTIR of the 2-(4-methylbenzylidene) malononitrile (**2c**).



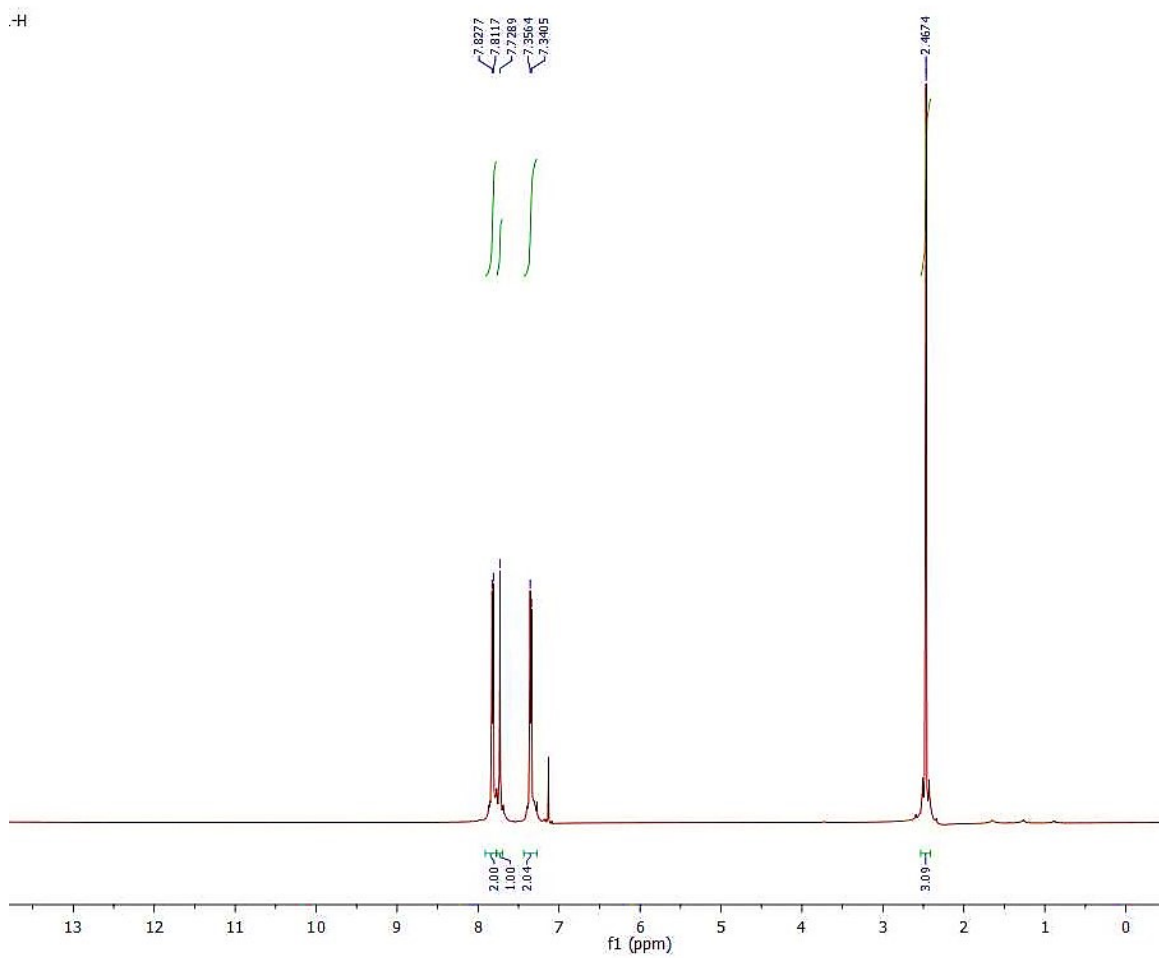

**Fig. S9.** <sup>1</sup>H NMR of the 2-(4-methylbenzylidene)malononitrile (**2c**).

V1-C

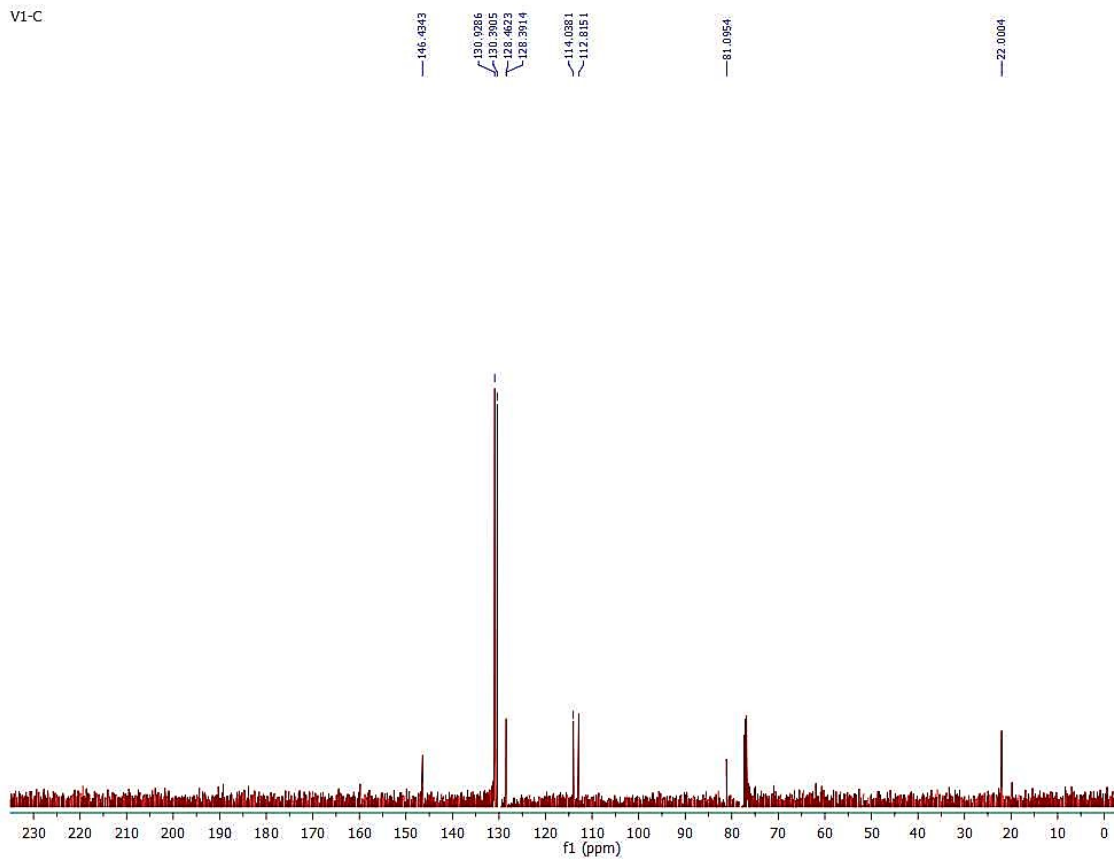

**Fig. S10.**  $^{13}\text{C}$  NMR of the 2-(4-methylbenzylidene)malononitrile (**2c**).

**2-(2,4-dichlorobenzylidene)malononitrile (2g)**

FTIR (KBr,  $\text{cm}^{-1}$ ): 3097, 3043, 2227, 1577, 1546, 1461;  $^1\text{H}$ NMR (500MHz,  $\text{CDCl}_3$ ):  $\delta$  (ppm) 8.19 (s, 1H), 8.15 (d,  $J = 8.5$  Hz, 1H), 7.5 (s, 1H), 7.4 (d,  $J = 8.5$  Hz, 1H);  $^{13}\text{C}$  NMR (125 MHz,  $\text{CDCl}_3$ )  $\delta$  (ppm) 154.6, 141, 137.1, 130.7, 130.2, 128.3, 127.5, 113, 111.8, 85.9.

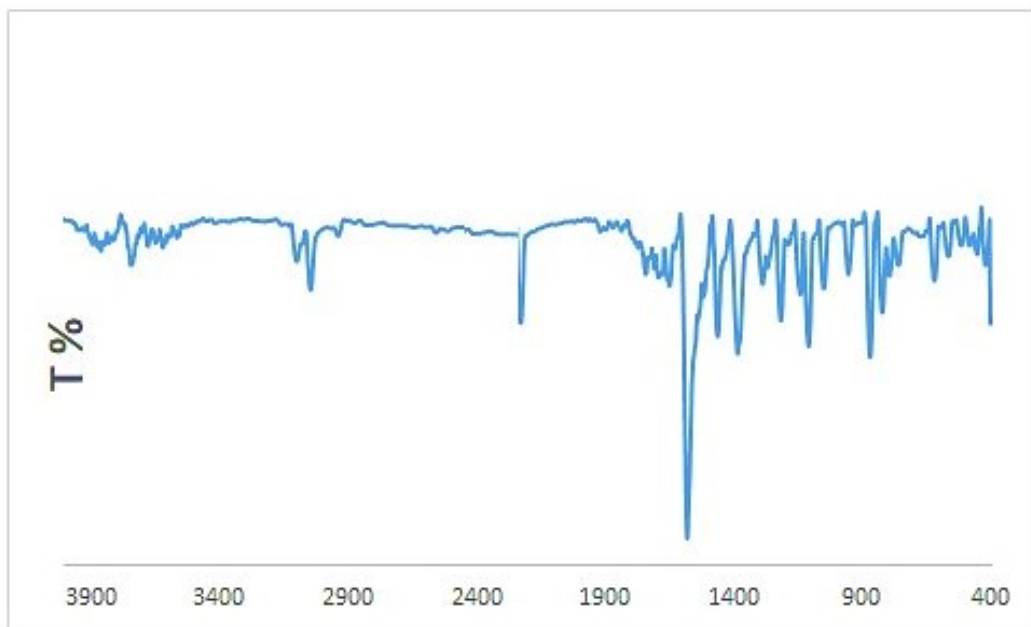

**Fig. S11.** FTIR of the 2-(2,4-dichlorobenzylidene)malononitrile (**2g**).

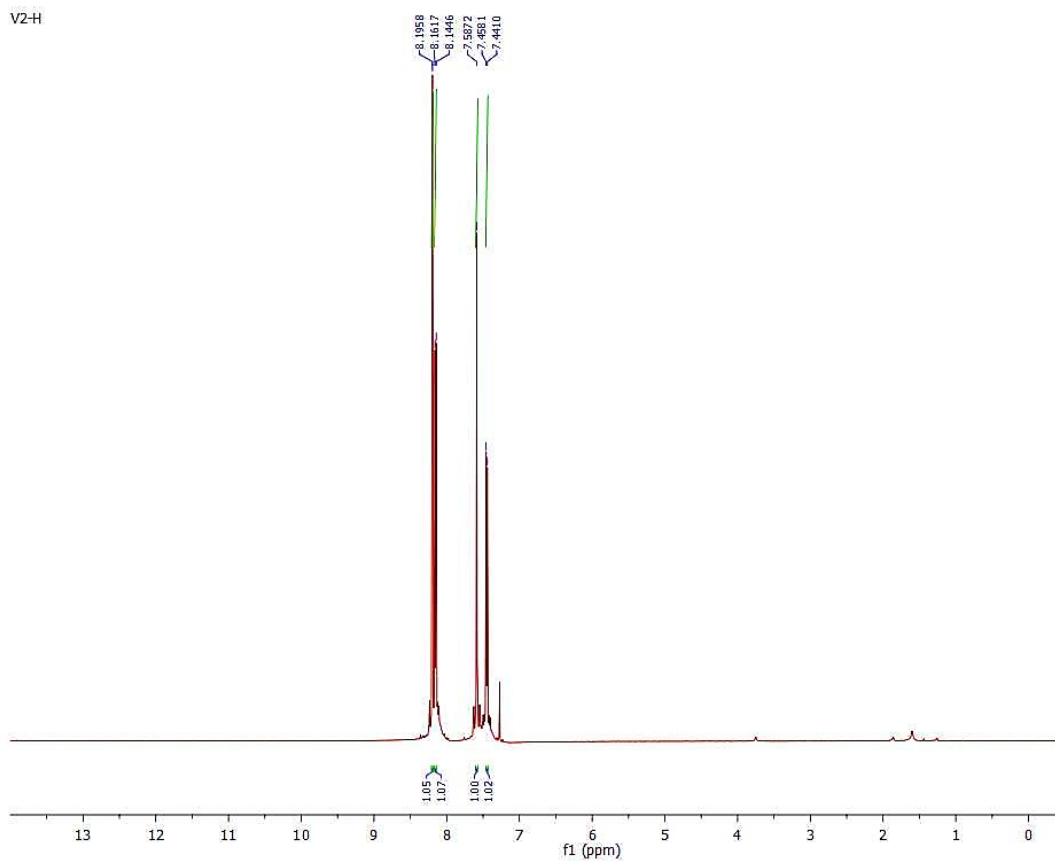

**Fig. S12.**  $^1\text{H}$ NMR of the 2-(2,4-dichlorobenzylidene)malononitrile (**2g**).

V2-C

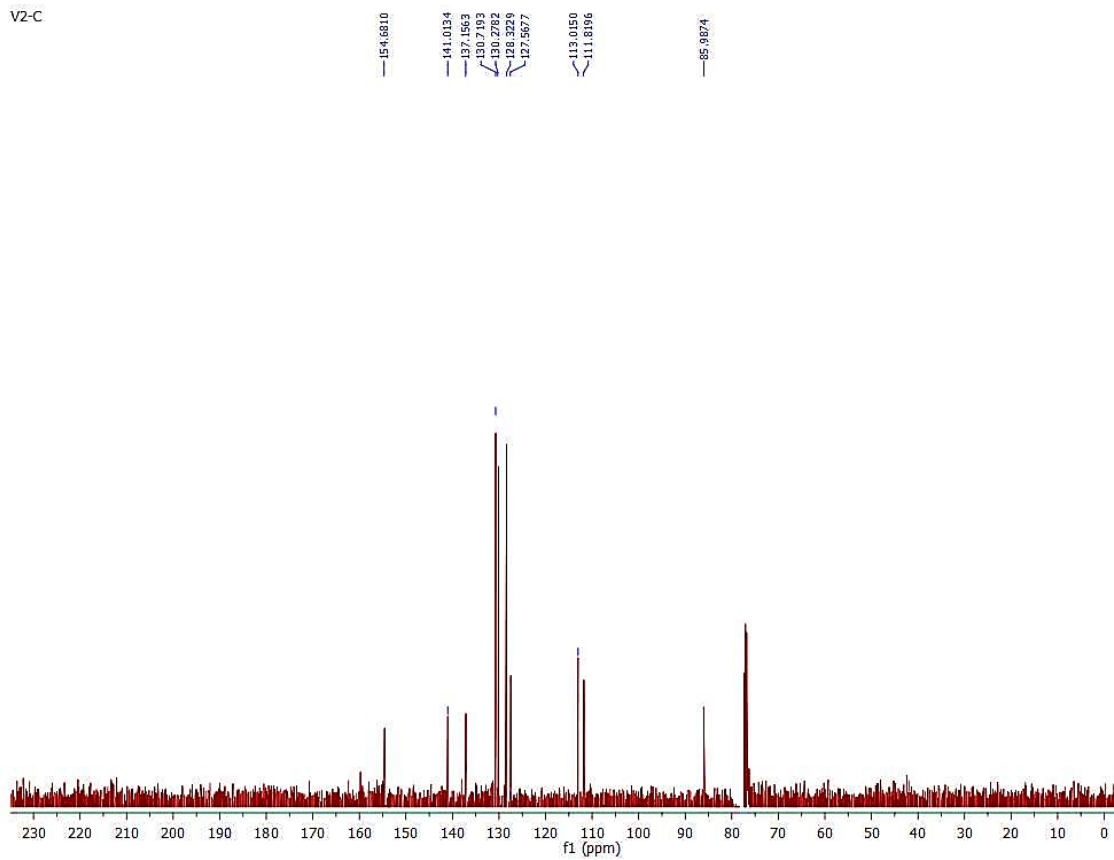

**Fig.S13.**  $^{13}\text{C}$  NMR of the 2-(2,4-dichlorobenzylidene)malononitrile (**2g**).
